# Supplementary material for: Robust Biomimetic Nacreous Aramid Nanofiber Composite Films with Ultrahigh Thermal Conductivity by Introducing Graphene Oxide and Edge-Hydroxylated Boron Nitride Nanosheet
Source: MDPI journal article supplement (doi:10.3390/nano11102544), 2021-09-28
Supplement: s1 [file s1]

# Robust Biomimetic Nacreous Aramid Nanofiber Composite Films with Ultrahigh Thermal Conductivity by Introducing Graphene Oxide and Edge-Hydroxylated Boron Nitride Nanosheet

Cenkai Xu <sup>1</sup>, Chengmei Wei <sup>1</sup>, Qihan Li <sup>2</sup>, Zihan Li <sup>1</sup>, Zongxi Zhang <sup>3</sup> and Junwen Ren <sup>1,\*</sup>

<sup>1</sup> College of Electrical Engineering, Sichuan University, Chengdu 610065, China; 2018141411155@stu.scu.edu.cn (C.X.); weichengmei@stu.scu.edu.cn (C.W.); 2020223035177@stu.scu.edu.cn (Z.L.)

<sup>2</sup> College of Aviation Engineering, Civil Aviation Flight University of China, Guanghan 618307, China; 2018141441007@stu.scu.edu.cn

<sup>3</sup> Electric Power Research Institute, State Grid Corporation of Sichuan Province, Chengdu 610072, China; 2019223035137@stu.scu.edu.cn

\* Correspondence: myboyryl@scu.edu.cn

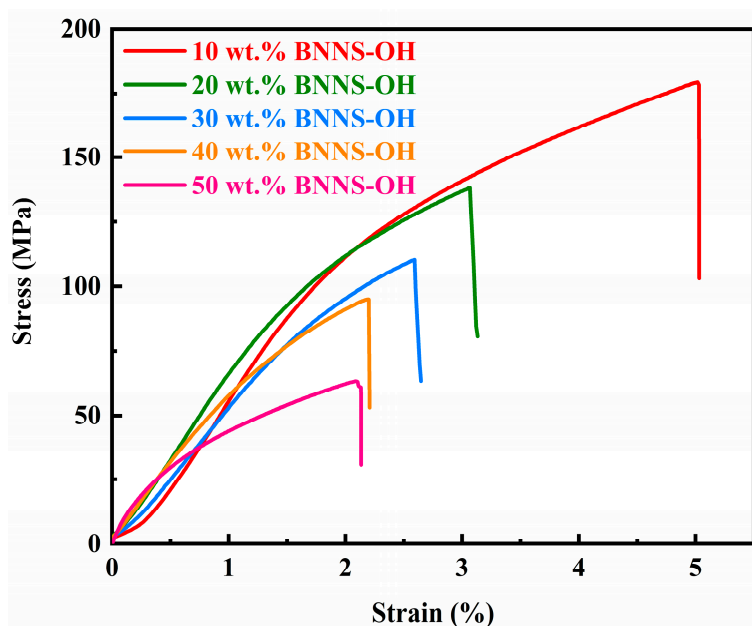

Figure S1. Typical stress-strain curves of ANF/BNNS-OH films.

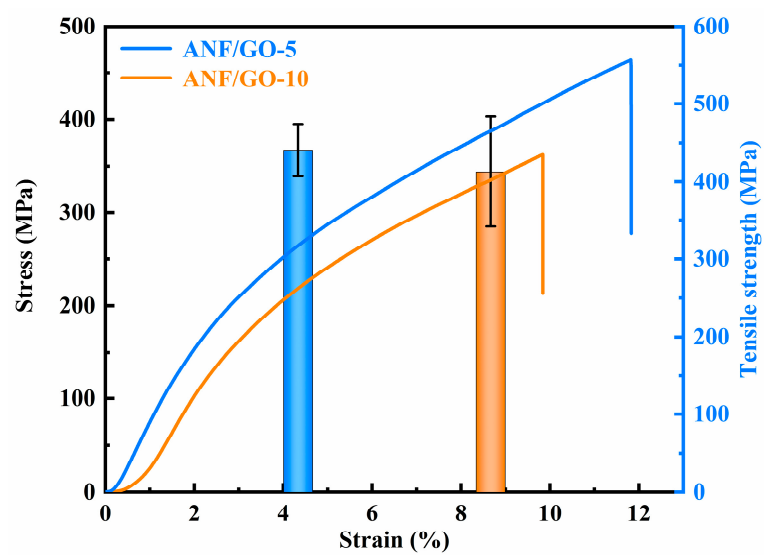

**Figure S2.** Typical stress-strain curves and tensile strength of ANF/GO-5 and ANF/GO-10 films.
